CORRECTION

# Correction: Crystal Structure of the Human Cytomegalovirus Glycoprotein B

Heidi G. Burke, Ekaterina E. Heldwein

The Funding Statement is missing funding information from the NIH. Please see the full Funding Statement [here](#).

This study was funded by the Burroughs Wellcome Fund Award for Investigators in Pathogenesis (EEH) and the NIH T32-AI007422 (HGB). This work is based upon research conducted at the Northeastern Collaborative Access Team beamlines, which are funded by the National Institute of General Medical Sciences from the National Institutes of Health (P41 GM103403). The funders had no role in study design, data collection and analysis, decision to publish, or preparation of the manuscript.

## Reference

1. Burke HG, Heldwein EE (2015) Crystal Structure of the Human Cytomegalovirus Glycoprotein B. *PLoS Pathog* 11(10): e1005227. doi: [10.1371/journal.ppat.1005227](https://doi.org/10.1371/journal.ppat.1005227) PMID: [26484870](https://pubmed.ncbi.nlm.nih.gov/26484870/)

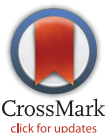

## OPEN ACCESS

**Citation:** Burke HG, Heldwein EE (2015) Correction: Crystal Structure of the Human Cytomegalovirus Glycoprotein B. *PLoS Pathog* 11(11): e1005300. doi:10.1371/journal.ppat.1005300

**Published:** November 17, 2015

**Copyright:** © 2015 Burke, Heldwein. This is an open access article distributed under the terms of the [Creative Commons Attribution License](https://creativecommons.org/licenses/by/4.0/), which permits unrestricted use, distribution, and reproduction in any medium, provided the original author and source are credited.
